# Supplementary material for: Size-controlled synthesis of water-dispersible superparamagnetic Fe3O4 nanoclusters and their magnetic responsiveness
Source: Royal Society of Chemistry journal article supplement (doi:10.1039/c5ra14354c), 2015-01-01
Supplement: c5ra14354c1.pdf [file c5ra14354c1.pdf]

## **Supplementary information**

### **Size-controlled synthesis of water-dispersible superparamagnetic Fe<sub>3</sub>O<sub>4</sub> nanoclusters and their magnetic responsiveness**

**Wentao Wang, Bingtao Tang,\* Benzhi Ju, and Shufen Zhang**

State Key Laboratory of Fine Chemicals, Dalian University of Technology, Dalian  
116024, China

\*Corresponding author: tangbt@dlut.edu.cn; Fax: +86-411-84986264;

Tel: +86-411-84986267.

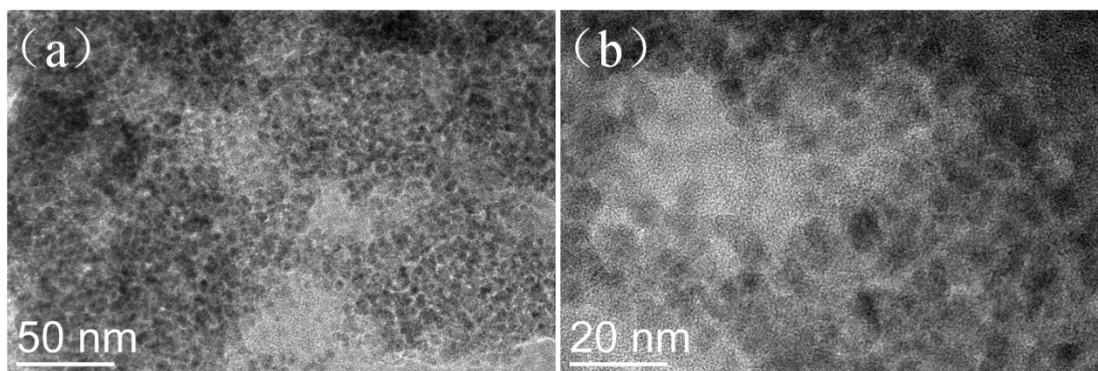

Fig. S1 (a) TEM image at higher magnification and (b) HRTEM image of  $\text{Fe}_3\text{O}_4$  particles synthesized with 80/0 of  $V_{\text{DEG}}/V_{\text{EG}}$ .

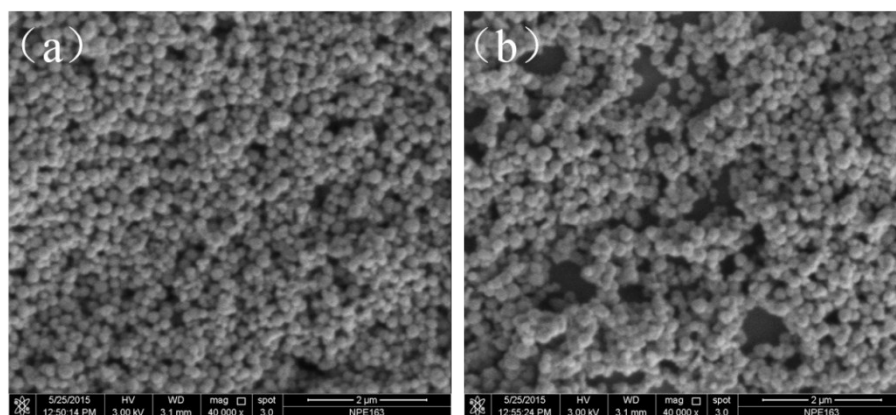

Fig. S2 SEM images of  $\text{Fe}_3\text{O}_4$  particles which were synthesized (a) without  $\text{Na}_3\text{Cit}$  and (b) with 0.1g  $\text{Na}_3\text{Cit}$ .

Table S1. Hydrodynamic size and PDI at different pHs for  $\text{Fe}_3\text{O}_4$  nanoclusters synthesized with 1 g  $\text{Na}_3\text{Cit}$  under  $V_{\text{DEG}}/V_{\text{EG}}=40/40$ .

| pH                      | 3     | 4     | 5     | 6     | 7     | 8     | 9     | 10    | 11    |
|-------------------------|-------|-------|-------|-------|-------|-------|-------|-------|-------|
| Z-Average Diameter (nm) | 247.9 | 1473  | 1161  | 207.8 | 219.2 | 220   | 210.4 | 213.9 | 205.4 |
| PDI                     | 0.112 | 0.853 | 0.745 | 0.163 | 0.078 | 0.063 | 0.065 | 0.024 | 0.085 |

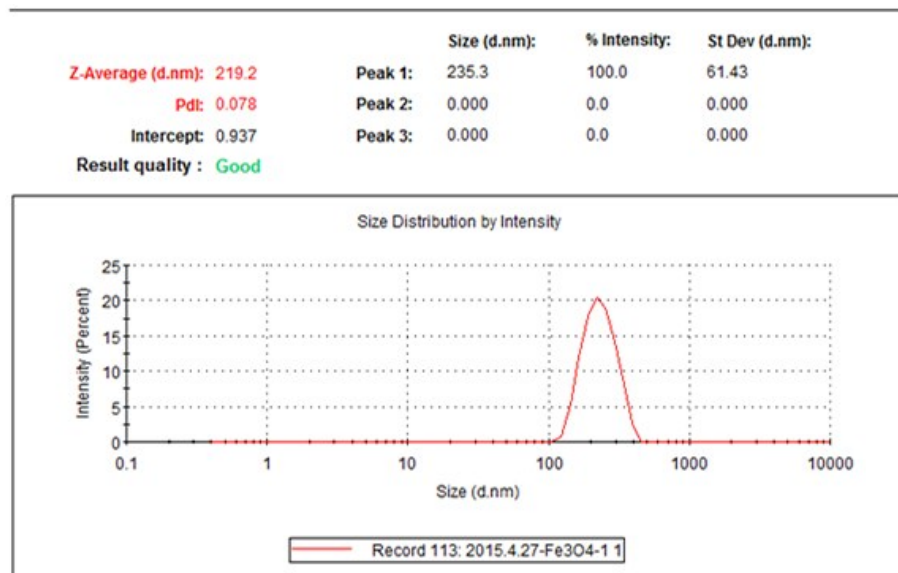

Fig. S3 A typical intensity particle size distribution at pH=7 for  $\text{Fe}_3\text{O}_4$  nanoclusters synthesized with 1 g  $\text{Na}_3\text{Cit}$  under  $V_{\text{DEG}}/V_{\text{EG}}=40/40$ .

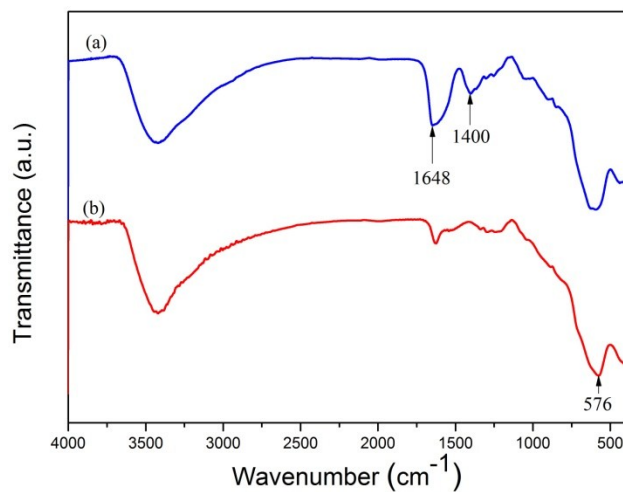

Fig. S4 FTIR spectra of  $\text{Fe}_3\text{O}_4$  nanoparticles synthesized with 1g  $\text{Na}_3\text{Cit}$  (a) and the uncoated magnetite particles synthesized by co-precipitation (b).

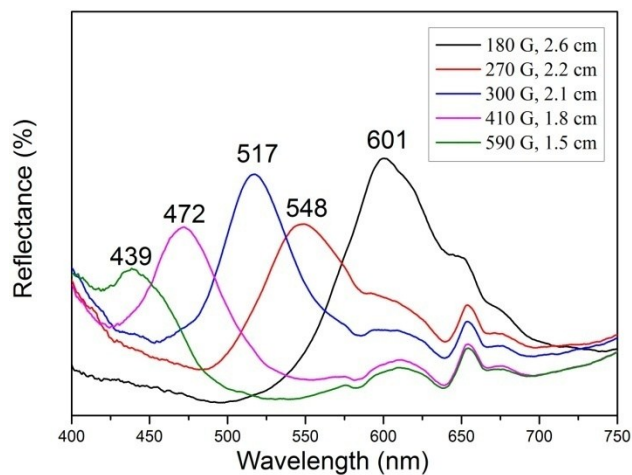

Fig. S5 Reflectance spectra of the 168 nm  $\text{Fe}_3\text{O}_4$  nanoclusters with water dispersions of about  $16.3 \text{ mg}\cdot\text{mL}^{-1}$  as the magnetic field increased from 180 G to 590 G by moving the magnet toward the sample (2.6 cm to 1.5 cm).
